# Supplementary material for: Effect of Exposure to Gun Violence in Video Games on Children’s Dangerous Behavior With Real Guns: A Randomized Clinical Trial
Source: PubMed Central journal article supplement (PMC6547242; doi:10.1001/jamanetworkopen.2019.4319), 2019-05-31
Supplement: jamanetwopen-2-e194319-s003.pdf [file jamanetwopen-2-e194319-s003.pdf]

## Data Sharing Statement

Chang. Effect of exposure to gun violence in video games on children's dangerous behavior with real guns: a randomized clinical trial. *JAMA Netw Open*. Published May 31, 2019. 10.1001/jamanetworkopen.2019.4319

### Data

**Data available:** Yes

**Data types:** Deidentified participant data

**How to access data:** Data will be held on Dataverse. Please contact the research team for access.

**When available:** With publication

### Supporting Documents

**Document types:** Statistical/analytic code, Informed consent form

**How to access documents:** Data will be uploaded to figshare and Dataverse. Please contact the research team for access.

**When available:** With publication

### Additional Information

**Who can access the data:** Anyone requesting the data

**Types of analyses:** For any purpose

**Mechanisms of data availability:** Without investigator support

**Any additional restrictions:** N/A
